# Supplementary material for: Predictors of Initial Smear-Negative Active Pulmonary Tuberculosis with Acute Early Stage Lung Injury by High-Resolution Computed Tomography and Clinical Manifestations: An Auxiliary Model in Critical Patients
Source: PubMed Central journal article supplement (PMC6418143; doi:10.1038/s41598-019-40799-w), 2019-03-14

**Predictors of Initial Smear-Negative Active Pulmonary Tuberculosis with Acute  
Early Stage Lung Injury by High-Resolution Computed Tomography and  
Clinical Manifestations: An auxiliary model in critical patients**

Jun-Jun Yeh

**Supplementary Table S1.** The relative score of CXR (including R1, R2, and R3), HRCT, and CXR plus hypoalbuminemia in the G1(G3), G2(G4) populations.

|                                        | <b>G1</b><br><b>(n=26)</b> | <b>G2</b><br><b>(n=233)</b> | <b>G3</b><br><b>(n=31)</b> | <b>G4</b><br><b>(n=341)</b> |
|----------------------------------------|----------------------------|-----------------------------|----------------------------|-----------------------------|
| <b>CXR</b>                             |                            |                             |                            |                             |
| <b>Relative score of R1</b>            |                            |                             |                            |                             |
| 0                                      | 8                          | 127                         | 4                          | 152                         |
| 1                                      | 7                          | 86                          | 19                         | 153                         |
| 2                                      | 11                         | 20                          | 8                          | 36                          |
| <b>Relative score of R2</b>            |                            |                             |                            |                             |
| 0                                      | 8                          | 129                         | 5                          | 151                         |
| 1                                      | 7                          | 84                          | 18                         | 154                         |
| 2                                      | 11                         | 20                          | 8                          | 36                          |
| <b>Relative score of R3</b>            |                            |                             |                            |                             |
| 0                                      | 8                          | 128                         | 5                          | 152                         |
| 1                                      | 7                          | 85                          | 18                         | 153                         |
| 2                                      | 11                         | 20                          | 8                          | 36                          |
| <b>HRCT score</b>                      |                            |                             |                            |                             |
| 0                                      | 1                          | 214                         | 2                          | 330                         |
| 1                                      | 0                          | 11                          | 0                          | 7                           |
| 2                                      | 1                          | 5                           | 0                          | 2                           |
| 3                                      | 24                         | 3                           | 29                         | 2                           |
| <b>CXR score +<br/>Hypoalbuminemia</b> |                            |                             |                            |                             |
| 0                                      | 7                          | 123                         | 4                          | 146                         |
| 1                                      | 8                          | 90                          | 19                         | 159                         |
| 2                                      | 11                         | 20                          | 8                          | 36                          |

Data were summarized as number of patients in G1, G2, G3, and G4.

R1, Radiologist 1; R2, Radiologist 2; R3, Radiologist 3

**Supplementary Table S2.** Summary of patients in R1 vs. R2 of HRCT and CXR in the derivation cohort

|                |   | Relative score (R1) |    |    |    |
|----------------|---|---------------------|----|----|----|
|                |   | 0                   | 1  | 2  | 3  |
| <b>HRCT</b>    |   |                     |    |    |    |
| Relative score | 0 | 211                 | 1  | 0  | 0  |
| (R2)           | 1 | 3                   | 11 | 0  | 0  |
|                | 2 | 0                   | 0  | 6  | 2  |
|                | 3 | 0                   | 0  | 1  | 24 |
| <b>CXR</b>     |   |                     |    |    |    |
| Relative score | 0 | 130                 | 7  | 0  | -  |
| (R2)           | 1 | 5                   | 86 | 0  | -  |
|                | 2 | 0                   | 0  | 31 | -  |
|                | 3 | -                   | -  | -  | -  |

Data were summarized as number of patients.

R1, Radiologist 1; R2, Radiologists 2; R3, Radiologist 3

**Supplementary Table S3.** The sensitivity, specificity, positive predictive value, and negative predictive value of HRCT and CXR plus Hypoalbuminemia models in the new validation cohort\*\* (N=155).

| Predictive results        | CXR + Hypoalbuminemia score |                                 | HRCT score§               |                                 |
|---------------------------|-----------------------------|---------------------------------|---------------------------|---------------------------------|
|                           | Predicted iSN-aPTB (n=12)   | Predicted [non-aPTB-PD] (n=143) | Predicted iSN-aPTB (n=12) | Predicted [non-aPTB-PD] (n=143) |
|                           | ≥ 2                         | < 2                             | ≥ 3                       | < 3                             |
| G5 (n=12) **              | 5                           | 7                               | 11                        | 1                               |
| G6 (n=143)                | 7                           | 136                             | 1                         | 142                             |
| <b>Predictive terms</b>   |                             |                                 |                           |                                 |
| Sensitivity               | 41.6% (5/12)                |                                 | 91.6% (11/12)             |                                 |
| Specificity               | 95.1% (136/143)             |                                 | 99.3% (142/143)           |                                 |
| False positive rate       | 4.9% (7/143)                |                                 | 0.7% (1/143)              |                                 |
| False negative rate       | 58.4% (7/12)                |                                 | 8.4% (2/31)               |                                 |
| Positive predictive value | 41.6% (5/12)                |                                 | 91.6% (11/12)             |                                 |
| Negative predictive value | 95.1% (136/143)             |                                 | 99.3% (124/143)           |                                 |

CXR, chest X-ray; False positive rate=1-specificity; False negative rate=1-sensitivity.

G5 (N=12), initial smear-negative active pulmonary tuberculosis (iSN-aPTB);

G6=non-aPTB pulmonary diseases [non-aPTB-PD]

\* Streptococcus pneumoniae (by blood culture and urinary antigen)

\* Includes aPTB with bacteria\* (n=1, grouped the [aPTB concomitant with Streptococcus pneumoniae] as [iSN-aPTB,G5]) \*\*

G6 including (n=143): collagen vascular disease (n=2), lung cancer or metastatic cancer to lung (n=10),smear-negative aPTB (n=9),non-tuberculosis mycobacterium (n=5), cryptococcosis (n=1), aspergillosis (n=1), pneumonia (n=102), actinomycosis (n=0),other lung disease (n=13) such as pulmonary edema(n=12) sarcoidosis (n=0),

hypersensitivity pneumonitis (n=1).

**New validation cohort** prevalence=12/155=7.7%; pre-test odd ratio  $7.7/[100-7.7]=0.083$ ; likelihood ratio=91.6/0.7=130; post-test odd ratio=0.083 x 130=10.79; post-test probability= $10.79/[10.79+1]=91.5\%$ .

Given a low prevalence =0.1% ; pre-test odd ratio  $0.1/[100-0.1]=0.001$ ; likelihood ratio=91.6/0.7=130; post-test odd ratio=0.001 x 130=0.13; post-test probability= $0.13/[0.13+1]=56.5\% > 5\%$  ,it is the optimal level of cut-off threshold for isolation as described previously

§Patients (including [iSN-aPTB concomitant with Streptococcus pneumoniae]) were isolated and received anti-TB therapeutic drug if HRCT total score was  $\geq 3$ . After the confirmed diagnosis of these 155 patients, the model was tested in the **new validation cohort**.

**Supplementary Table S4.** Derivation cohort (N=259) and Validation (N=372) cohort received HRCT with Nasal/Mask or BiPAP at ER and invasive mechanical ventilator during ICU in early stage ALI

| ALL patients received CXR at ER (N=631 ) | Derivation Cohort   |                   | Validation Cohort    |                  |
|------------------------------------------|---------------------|-------------------|----------------------|------------------|
|                                          | (n=259)             |                   | (n=372)              |                  |
| HRCT(Before ICU)※                        | ER                  | ICU               | ER                   | ICU              |
| Nasal/ Mask                              | 195+48+(5)/259<br>※ |                   | 196+154+(6)/372<br>※ |                  |
| BiPAP                                    | 11 /259             |                   | 16/372               |                  |
| Invasive Ventilator                      |                     |                   |                      |                  |
| HRCT( after ICU)*                        |                     |                   |                      |                  |
| Nasal/Mask                               |                     | (48/259)          |                      | (154/372)        |
| BiPAP                                    |                     | (11/259)          |                      | (16/372)         |
| Invasive Ventilator                      |                     | (195)+5*<br>/259- |                      | (196)+6*<br>/372 |

**ER: Emergency Room    ICU: intensive care unit**

On Oxygen nasal cannula/Mask

BiPAP (Bi-Level Positive Air Pressure, BIPAP® FOCUS™ N, Respironics, Philips),

Invasive Mechanical Ventilation

※ Received HRCT at ER(before ICU) except (5)/259 in derivation cohort and (6)/372 in validation cohort

\* Received HRCT after invasive mechanical ventilation during ICU(after ICU), these 5/259 patients in derivation cohort and 6/372 patients in validation cohort with nasal/mask at ER

**Supplementary Table S5.** The actual timing of artery blood gas (P/F ratio<300 mmHg), bilateral infiltration in Chest-x-ray and HRCT

| <b>Derivation cohort (time to get data and interpretation, n=259, all with 24 h)</b> |                    |
|--------------------------------------------------------------------------------------|--------------------|
| <b>Procedure</b>                                                                     | <b>Time (hour)</b> |
| Artery blood gas                                                                     | 1.37±0.42          |
| Chest- x-ray                                                                         | 1.77±0.77          |
| High-resolution computer tomography                                                  | 7.39±4.69          |

| <b>Validation cohort (time to data and interpretation, n=372, all with 24 h)</b> |                    |
|----------------------------------------------------------------------------------|--------------------|
| <b>Procedure</b>                                                                 | <b>Time (hour)</b> |
| Artery blood gas                                                                 | 1.53± 0.52         |
| Chest- x-ray                                                                     | 2.06± 0. 82        |
| High-resolution computer tomography                                              | 8.65± 5.26         |

**Supplementary Figure S1** Flow chart of the derivation cohort. Group1 (G1)=initial smear-negative and finally active pulmonary tuberculosis [iSN-aPTB]; Group2 (G2)=non-aPTB pulmonary diseases [non-aPTB-PD].

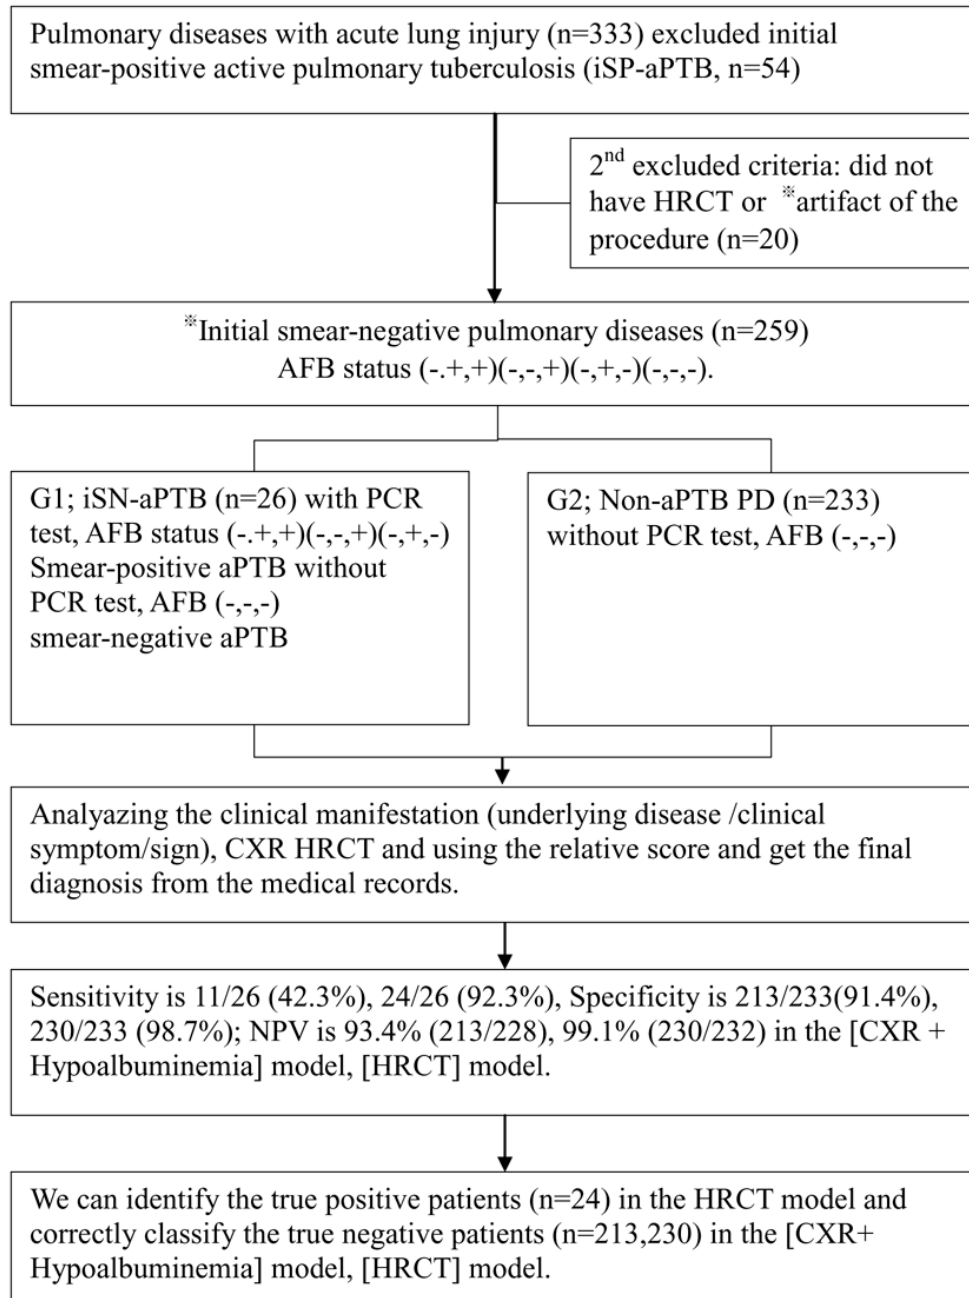

\* All the patients having the informed consent of the HRCT when receiving the HRCT at the same time



**Supplementary Figure S2** Flow chart of the validation cohort. Group3 (G3)=initial smear-negative active pulmonary tuberculosis (iSN-aPTB); Group G4 (G4)=non-aPTB pulmonary diseases [non-aPTB-PD]

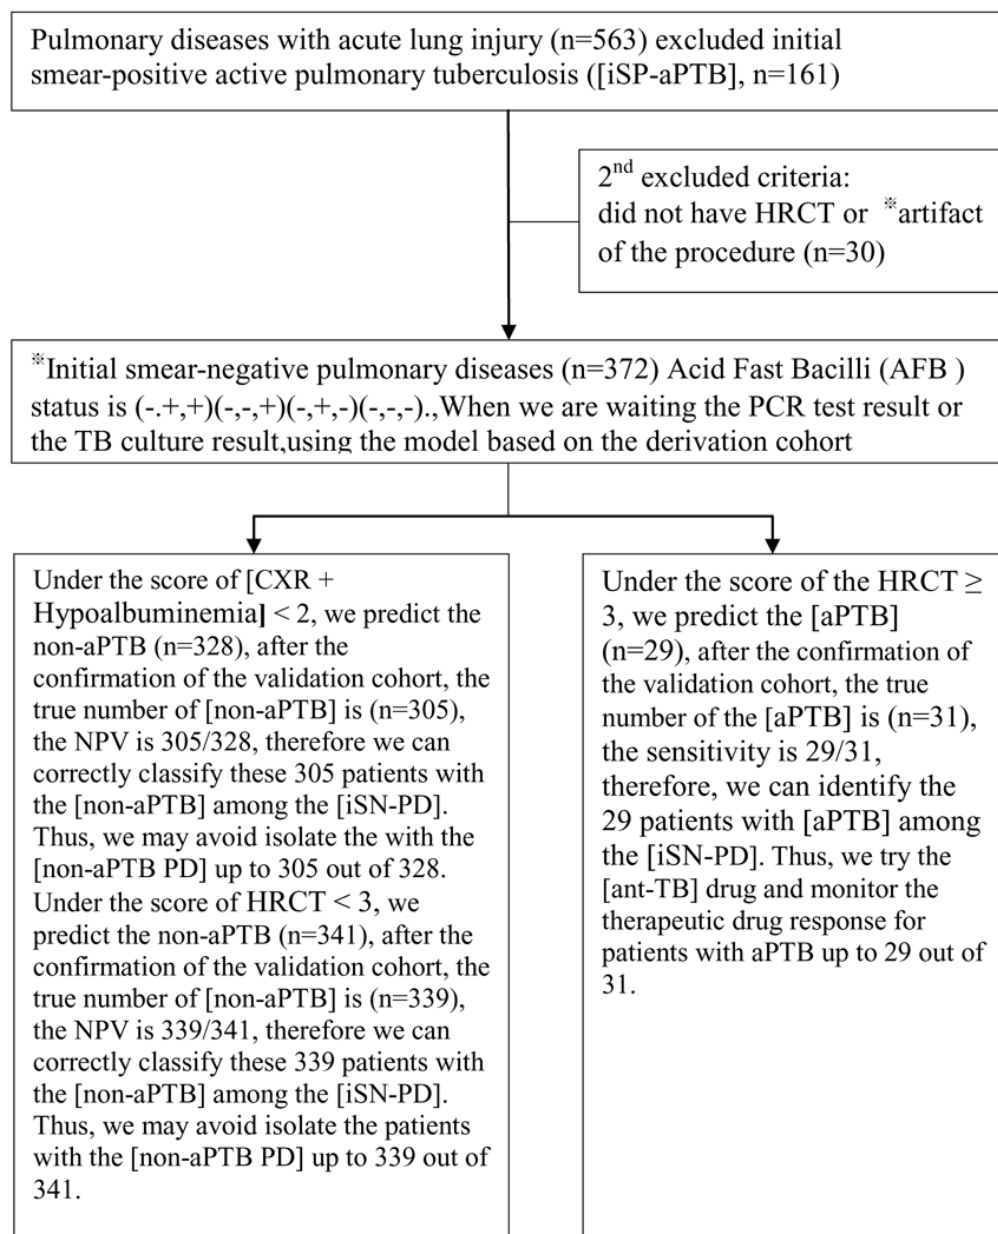

\*All the patients having the informed consent of the HRCT , medical records when receiving the HRCT at the same time

**Supplementary Figure S3** Presentation of a 74-year-female [aPTB +pneumococcus pneumonia] with acute lung injury, presenting as dyspnea (score=0) in HRCT. The coronal section of HRCT shows consolidation in s6 of right lower lobe (right black arrowhead) (score=1)] and clusters nodules/mass in s1+2 of left supper lobe (score=2) ; black arrow indicates the major fissure (total score =3).

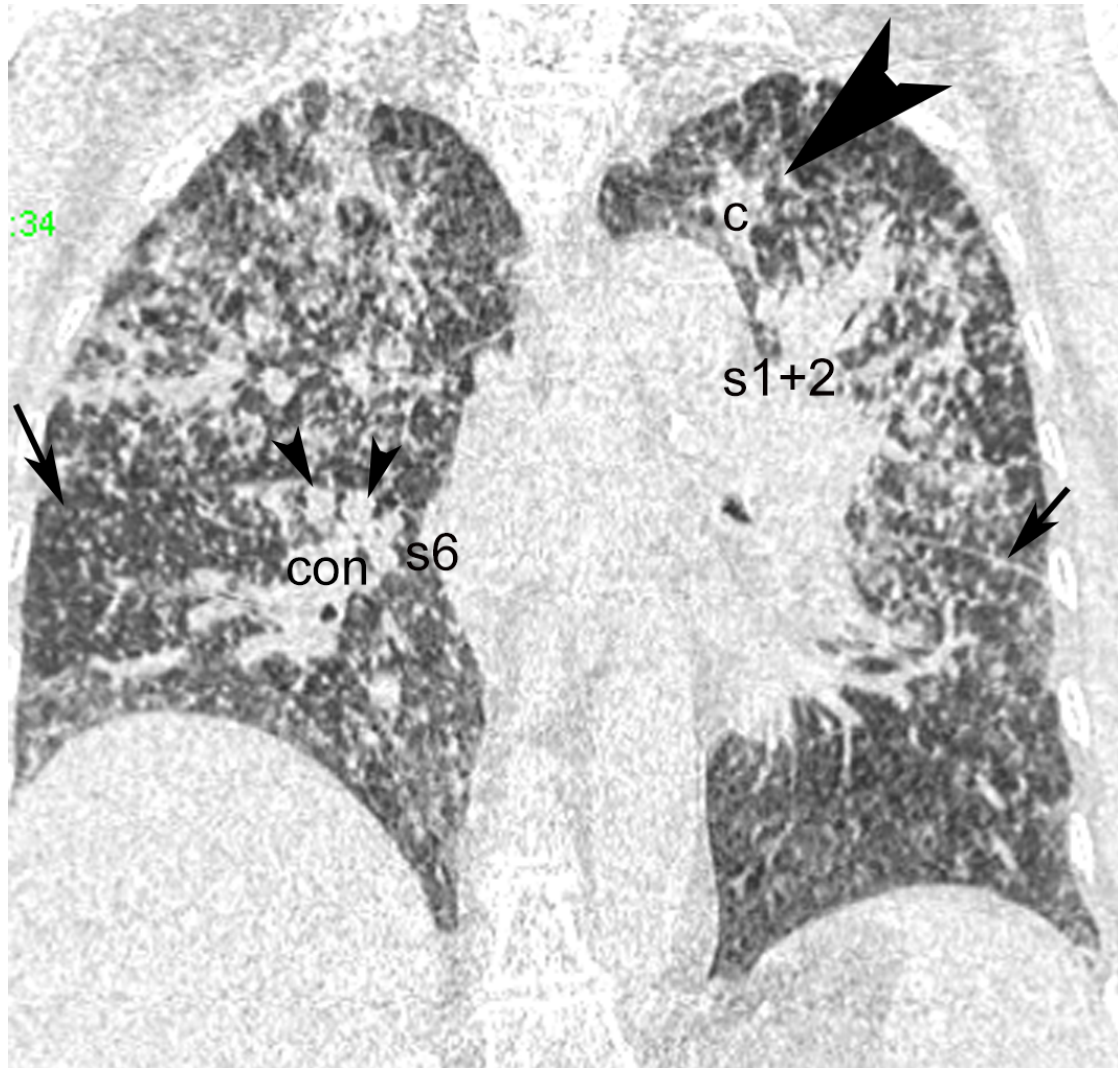

Supplement: 41598_2019_40799_MOESM1_ESM.pdf [file 41598_2019_40799_MOESM1_ESM.pdf]
